# Supplementary material for: Quantitative investigation on the stacking of metal ions induced by another metal ion based on moving substitution boundary electrophoresis
Source: Royal Society of Chemistry journal article supplement (doi:10.1039/c3ay41060a), 2013-01-01
Supplement: c3ay41060a.pdf [file c3ay41060a.pdf]

1

## Online Materials

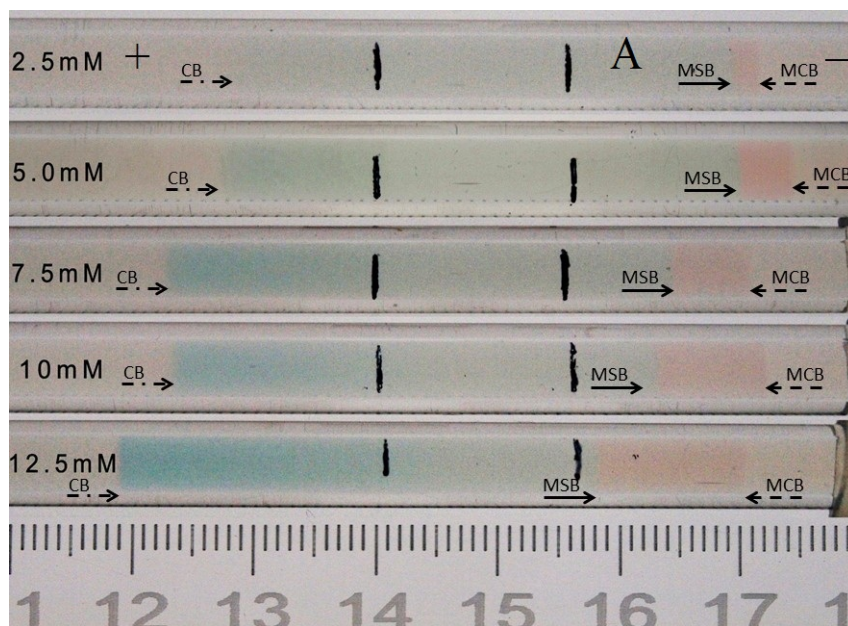

2

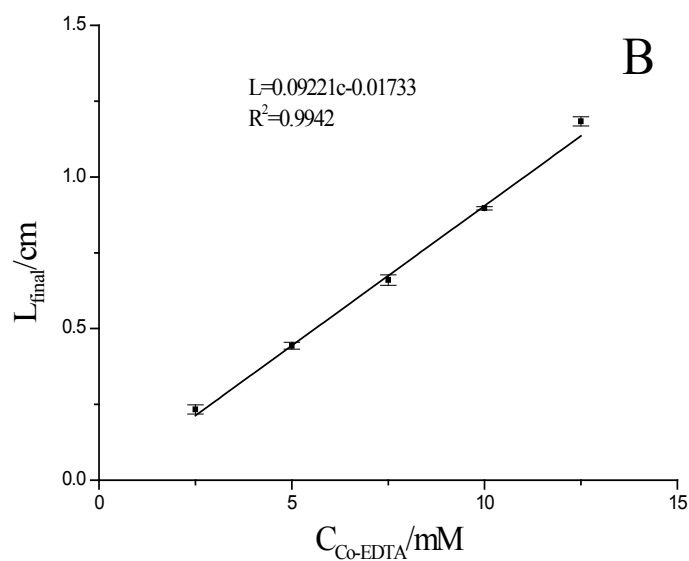

3

4 **Figure S1.** Effect of original sample concentration of  $[\text{Co-EDTA}]^{2-}$  on the stacking efficiency in  
5 tube experiment. (A) experimental photos and (B) length of stacked zone as a function of sample  
6 concentration. Experiment condition: 20 mM  $\text{Cu}^{2+}$  + 40 mM KCl in phase  $\alpha$  16 mm sample zone  
7 with 2.5-12.5 mM  $[\text{Co-EDTA}]^{2-}$  + 86/67/58/44/30 mM KCl in phase  $\beta$  and 2.0 mM EDTA + 94  
8 mM KCl in phase  $\gamma$ . The other conditions are the same as those in Fig.2.

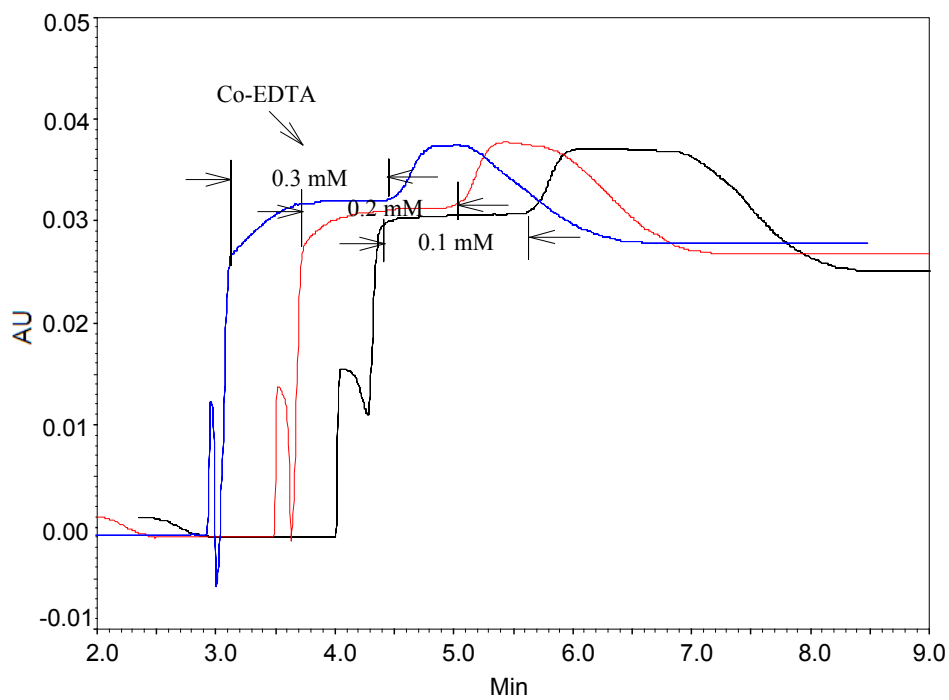

9

10 **Figure S2.** Effect of original sample concentration of  $[\text{Co-EDTA}]^{2-}$  on the stacking efficiency in  
11 CE.  $[\text{Co-EDTA}]^{2-}$  sample: 0.1/0.2/0.3 mM  $[\text{Co-EDTA}]^{2-}$  + 40 mM pH 5.0 HAc-NaAc, injection  
12 scheme: 2 psi 60 s  $[\text{Co-EDTA}]^{2-}$  sample followed by 2 psi 30 s of  $\text{Cu}^{2+}$ . Other conditions are the  
13 same as those in Fig.4.

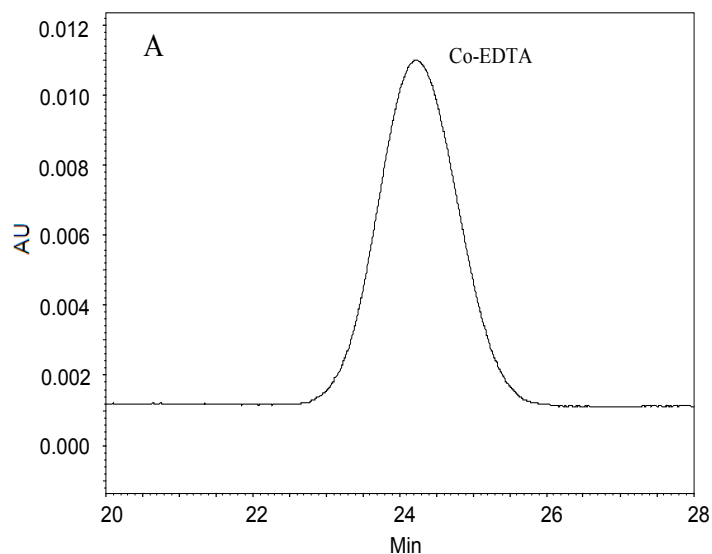

14

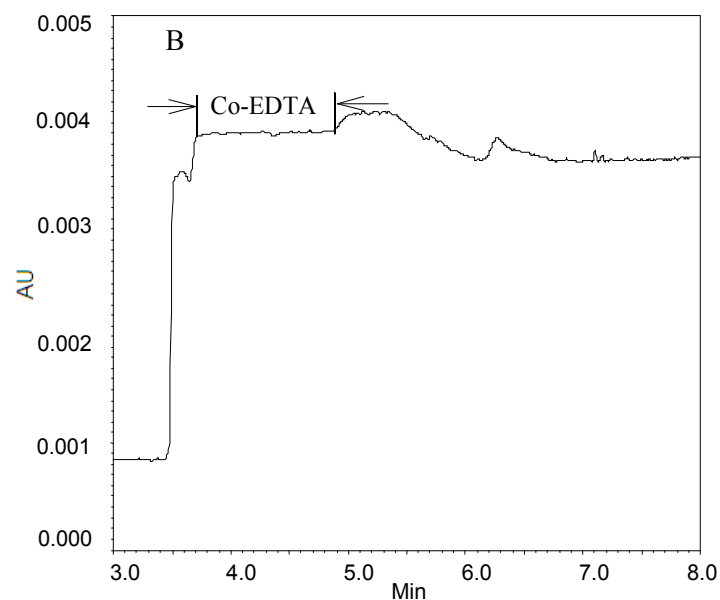

15

16 **Figure S3.** Comparison of electropherogram of [Co-EDTA]<sup>2-</sup> (A) in CZE mode and (B) in DES  
17 stacking mode. Experimental conditions: (A) 5.0 mM EDTA + 40 mM pH 5.0 HAc-NaAc as  
18 running buffer, 0.5 psi 10 s injection of 1.0 mM [Co-EDTA]<sup>2-</sup> sample (dissolved in 40 mM pH 5.0  
19 HAc-NaAc); (B) 0.05 mM EDTA + 40 mM pH 5.0 HAc-NaAc as cathodic and running buffer,  
20 0.4 mM Cu<sup>2+</sup> + 40 mM pH 5.0 HAc-NaAc as anodic buffer, 2 psi 60 s injection of 5.0 μM [Co-  
21 EDTA]<sup>2-</sup> sample (dissolved in 40 mM pH 5.0 HAc-NaAc) followed by 2 psi 30 s Cu<sup>2+</sup>. Other  
22 conditions are the same as those in Fig.4.

23

24

25

26

27

28

29

30

31

32

33

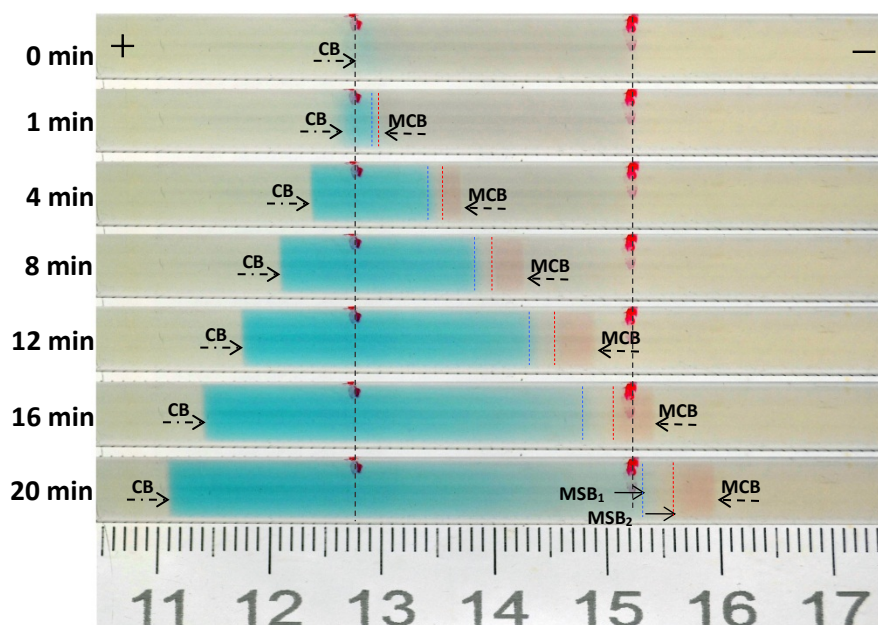

34

35

36

37

38

39

40

41

42

43

44

45

46

47

48

**Figure S4.** Formations of CB, MSB<sub>1</sub>, MSB<sub>2</sub>, MCB and three characteristic colour zones as well as boundary movements in the initial reaction system formed with 40 mM Cu<sup>2+</sup> in phase  $\alpha$ , 25 mm sample zone (see the black bars) of 4 mM [Co-EDTA]<sup>2-</sup> + 4 mM [Pb-EDTA]<sup>2-</sup> + 66 mM KCl in phase  $\beta$  and 4 mM EDTA + 108 mM KCl in phase  $\gamma$ . Experimental conditions: constant 160 V and 6mA; 2.0% agarose gel in electrophoretic tube with I.D. 3.74 mm, O.D. 6.0 mm and length 170 mm; 3.5 mL min<sup>-1</sup> flow rate of anolyte and catholyte; 20 min run duration. The blue dot-line, red dot-line, hard and break arrows imply the locations of MSB<sub>1</sub>, MSB<sub>2</sub>, CB and MCB, respectively.

Metal ion induced sample stacking in MSBE

49

50

51

52

53

54

55

56

57

58

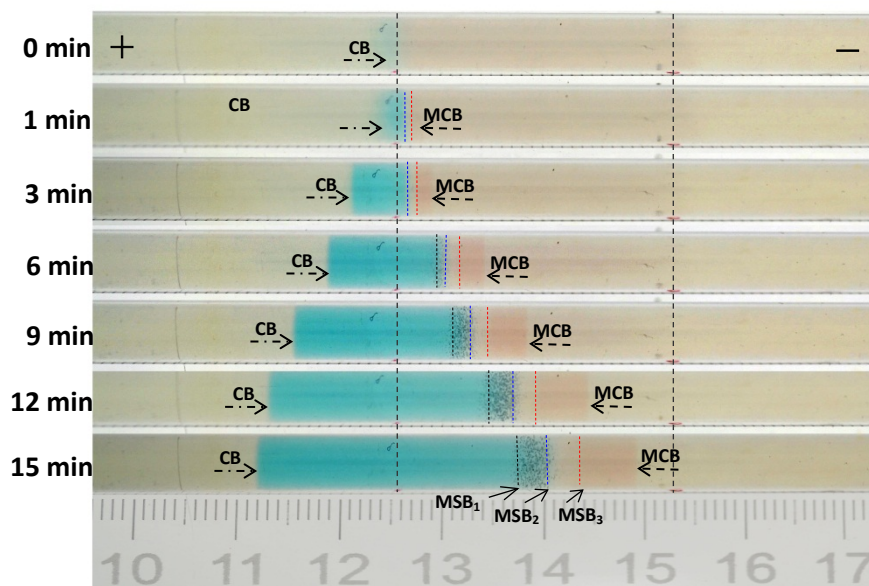

59 **Figure S5.** Formations of CB, MSB<sub>1</sub>, MSB<sub>2</sub>, MSB<sub>3</sub>, MCB and four characteristic colour zones as

60 well as boundary movements in the initial reaction system formed with 30 mM Cu<sup>2+</sup> + 10 mM

61 KCl in phase  $\alpha$ , 27 mm sample zone (see the black bars) of 5 mM [Co-EDTA]<sup>2-</sup> + 5 mM [Pb-

62 EDTA]<sup>2-</sup> + 5 mM [Ni-EDTA]<sup>2-</sup> + 1 mM KCl in phase  $\beta$  and 4 mM EDTA + 88 mM KCl in phase

63  $\gamma$ . 15 min run duration. The other conditions are the same as those in Figure S4.

64
